# Supplementary material
Source: PubMed Central journal article supplement (PMC6058796)
Supplement: 2017_180851-Disclosures_and_Contributions.pdf [file 2017_180851-Disclosures_and_Contributions.pdf]

Haematologica  
HAEMATOL/2017/180851  
Version 3

Shortened telomeres in essential thrombocythaemia:  
clinicopathological and treatment correlations

Samah Alimam, Donal P. McLornan, Jie Jiang, Deepti Radia, Ghulam  
J. Mufti, and Claire N Harrison

Disclosures: S Alimam - none DP Mclornan - Jazz and Novartis speaker fees J Jiang - none D Radia - Novartis educational grants and Blueprint advisory board GJ Mufti - Celgene speaker fees and advisory board CN Harrison - Research grant from Novartis and speaker fees from Novartis and Shire

Contributions: SA - Performed research, data analysis and wrote the script DAM - Wrote the script and supervised study JJ - Performed research and wrote script DA - Supervised study GJM - Supervised study CNH - Wrote script and supervised study
